# Supplementary material for: Educational Signaling in Two Different Education Systems
Source: publisher site journal article supplement (doi:10.1515/bejte-2024-0076), 2025-06-01
Supplement: Supplementary file 1 [file j_bejte-2024-0076_suppl_001.docx]

**ONLINE APPENDIX**

**Signaling Model when Companies Learn the Worker´s Productivity after the First Working Period**

In this section, we assume that companies observe the worker´s productivity after one period working. This is the only difference introduced in the model of sections 3 and 4 of the main article. Here we assume that the worker is risk-neutral.

Now, we need to turn the indifference equation (1) into:

(O.1)

In this setting, the worker who decides to participate in the labor market in the first period will receive a wage equal to the monetary value of her productivity in the second period instead of the monetary value of the expected productivity among non-educated types. Then, the cost of education is higher for the indifferent type because she would receive a greater wage in the second period if she does not study.

In this new setting, we see that only the undemanding scenario may arise.

Undemanding Educational System. Now, assumption 1 is the same as that included in the main article, but assumptions 2 and 3 must be replaced by:

*Assumption 2*. .

*Assumption 3*. .

Unlike assumption 2 in the main paper, this new version of this assumption is satisfied for all values of the cost of education of the highest worker´s type. In fact, since , the left-hand side of the inequality in assumption 2 is greater than the right-hand side for all values of . As the reverse of assumption 2 cannot be satisfied under our new assumption, we conclude that the demanding scenario cannot appear when companies learn the worker´s productivity after one working period.

Now, we compare the separating equilibrium in the undemanding educational system with and without our new assumption.

*PROPOSITION O1. In the undemanding educational system, is lower when firms learn the worker´s productivity after one working period than when they cannot learn that productivity.*

This proposition shows that the employer´s capacity to observe the worker´s productivity after one working period leads to an equilibrium in which more worker´s types invest in education in the undemanding setting. In our new scenario, the cost of education for the indifferent type in equilibrium is greater because that type of worker would receive a greater wage in the second period after the company learns her true productivity. For this reason, in equilibrium, the opportunity cost of education of the indifferent type has to decrease in order to compensate that additional cost. Therefore, the indifferent type goes down. In other words, as the cost of investing in education is greater, a new equilibrium arises in which the expected productivity among non-educated types is lower, which implies that they receive a lower wage in period zero and the opportunity cost of education decreases compensating the greater cost of the educational investment.

*Proof of Proposition O1*. In the appendix of the main article, equation (A.1) is the worker´s indifference equation and equation (A.2) shows when companies cannot learn the worker´s capacity. When companies may learn the worker´s productivity, we can rewrite the worker´s indifference equation (O.1) as:

(O.2)

Where is a continuous function. Now, we obtain the derivative of this function with respect to , which is:

(O.3)

It is easy to see that . Additionally, , which is always satisfied because the lowest possible value of is greater than according to our assumption included in the main article: . Then, since in the undemanding educational system and , we conclude that those such that and G satisfy the following inequality: . QED.

Next, we obtain our comparative statics results.

*PROPOSITION O2. In the undemanding educational scenario, increases with and with and decreases with . Additionally, there exists a certain threshold, , such that when .*

The intuition of this proposition is the same as that shown in the main article and we proceed with its proof.

*Proof of Proposition O2*. First, we obtain the derivatives of the function included in (O.2):

(O.4)

(O.5)

(O.6)

(O.7)

Once again, must be a negative number for the same reasons as those shown to prove that in the proof of proposition 1 in the main article. Similarly, it is easy to see that and . Furthermore, decreases with and is positive when . Therefore, there exists a certain threshold, , such that when and when . As in the undemanding scenario (assumption 3), the result follows immediately by applying the implicit function theorem. QED.

**Limit Case when the Cost of Education does not Change with the Worker´s Type**

As a limit case, in this section we analyze what happens when the cost of education does not change with the worker´s type, that is, let us assume that . Here, we will assume that the worker is risk neutral and the worker´s type is drawn from a uniform distribution. Interestingly, the next lemma shows that the opportunity cost of education provides a mechanism in order to separate high from low-ability workers in this context.

*LEMMA O1. Under assumptions 1 and 2, when the cost of education does not change with t, there exists an equilibrium in which those types of worker lower than*  *choose and those types greater than choose , where .*

As a result of the introduction of the opportunity cost in our model, this lemma shows that the employer may use the investment in education in order to distinguish low from high-productivity workers. Without the opportunity cost of education, it would be impossible to obtain this type of separating equilibrium when the cost of education is the same for all worker´s types. In particular, if the additional wage received by educated workers were greater than the cost of education, all worker´s types would choose the high level of education. Otherwise, no worker´s type would invest in education. Hence, separation would not arise. In equilibrium, lemma O1 shows that the cost of education, including the opportunity cost, is equal to the additional wage received by educated workers and for this reason, each type of worker is indifferent between investing and not investing in education.

In the example included in the article, if the cost of the high level of education were , there would be a threshold separating equilibrium in which only those worker´s types greater than would invest in education. In this equilibrium, non-educated workers would receive a wage of 3.5 in period zero and an expected wage of 3.85 in period one, whereas educated workers would receive an expected income of 7.35 (expected wage minus the cost of education) in period 1. A similar threshold separating equilibrium would arise in our example as long as the cost of education is constant and lies between 0.5 and 5.5. This outcome is not “stable” in the sense that all educated and non-educated types of worker are completely indifferent between investing and not investing in education, and this equilibrium would not be supported if a slight mass of types changed their choice. However, the equilibrium would be “stable” as long as the cost of education slightly decreases with the worker´s type. Therefore, lemmas O1 and O2 should only be considered as limit cases that analyze what happens when the type-dependency of the educational cost vanishes[[1]](#footnote-1).

*Proof of Lemma O1*. To start with, we define a function representing the worker´s additional profit from choosing when those types lower than choose and those greater than choose :

(O.8)

Where . Under assumptions 1 and 2, and must take values such that and . Since , there exists a unique such that , which is equation (1) defining the indifferent worker´s type in a separating equilibrium. QED.

*LEMMA O2. Under assumptions 1 and 2, when the cost of education does not change with the worker´s type, increases with and with and decreases with . Furthermore, there exits such that decreases (increases) with when ().*

In the separating equilibrium considered, the cost of education of the indifferent type of worker, including the opportunity cost, must be equal to the profit from the educational investment. For this reason, when the discounted profit from investing in education goes up as a result of a rise in the discount factor (greater ), an increase in the expected price in the future (a greater ), a drop in the current price of the product when , a rise in the price of the product in period zero when , or a drop in the cost of education (), the opportunity cost of education for the indifferent type of worker must also increase. As the opportunity cost of education is the wage received by non-educated workers, it will only increase when the indifferent type goes up so that the average productivity of non-educated workers goes up.

*Proof of Lemma O2*. Given the function defined in (O.8), the indifference equation shown in (1) is equivalent to . Then, we obtain the following derivatives:

(O.9)

(O.10)

(O.11)

Since , then so that the indifference equation (1) is satisfied. As shown in equation (O.10), . Additionally, when , as shown by equation (O.11) and decreases with . Hence, there exists such that when and when .

Similarly, . Finally, since , we use the implicit function theorem in order to obtain the desired results:

(O.12)

(O.13)

(O.14)

when (O.15)

This completes the proof of lemma O2. QED.

**Sufficient Conditions for Each Scenario with General Prior Distributions of Types**

In this section, we determine the type of prior distribution functions of the worker´s productivities under which our scenarios arise.

Specifically, when the prior distribution of worker´s types is concentrated on the highest types or when is increasing ( decreases everywhere as shown in lemma 1 of the main article), then the undemanding scenario is more likely to appear. On the contrary, when the prior distribution of worker´s types is concentrated on the lowest types or when is decreasing ( increases everywhere as shown in lemma 1), then the demanding scenario is more likely to arise.

Therefore, some sufficient conditions for each scenario are shown in our next lemma.

*LEMMA O3. There exists such that the undemanding scenario will arise providing that and is increasing everywhere. Likewise, there exists such that the demanding scenario will arise as long as and is decreasing everywhere.*

This lemma shows that the undemanding scenario will be more likely to arise in those labor markets where most workers are highly productive and the educational system is universal. In fact, when the prior density function of worker´s types is increasing everywhere, an increase in the indifferent type leads to a greater expected wage among uneducated types in our separating equilibrium because the probability of the highest types in the pool of non-educated types is greater. As a result, when the indifferent type goes up, the expected wage among non-educated types goes up by more and the opportunity cost of education plays a more important role, which is what happens in the undemanding scenario. On the contrary, the demanding environment will arise as long as most workers are less productive and the cost of education decreases with the worker´s type sufficiently. In this case, a greater indifferent type increases the expected wage among non-educated types in equilibrium by less because the probability of the highest type in the pool of educated types is lower. For this reason, a rise in the indifferent type increases the opportunity cost of education by less and the signaling role of education is strengthened, which is what happens in the demanding environment.

*Proof of Lemma O3*. We need to analyze the sign of , which is shown in equation (A.27) in the appendix of the main article.

As shown by lemma 1, when is an everywhere increasing function, then . As a result, equation (A.27) shows that when . Since decreases with , there exists such that when .

Hence, we have proven that as long as is an everywhere increasing function and , which is the first part of lemma O3.

Similarly, lemma 1 shows that when is an everywhere decreasing function. From equation (A.27), we can guarantee that when .

Therefore, we have proven that as long as is an everywhere decreasing function and , which is the second part of lemma O3 and this completes the proof. QED.

1. In this limit case, there may be other equilibria with an arbitrary partition of workers´ types. We are grateful to an anonymous referee for this comment. [↑](#footnote-ref-1)
